# Supplementary material
Source: PubMed Central journal article supplement (PMC4125541)
Supplement: NIHMS551599-supplement-1_si_001.pdf [file NIHMS551599-supplement-1_si_001.pdf]

**Supplemental Table 1. Carotenoid profile (µg/g) of maize genotypes used in micellarization studies**

| #  | Pedigree                                                                                                                    | Lutein | Zea <sup>a</sup> | βCX  | βC   |
|----|-----------------------------------------------------------------------------------------------------------------------------|--------|------------------|------|------|
| 1  | ((DTPYC9-F65-2-3-1-1-B-BxDTPYC9-F65-2-2-1-1-B-B)xDTPYC9-F102-4-5-1-1-B-B-B)-B-B-1-2-B-B)-B-B                                | 8.9    | 34.9             | 4.4  | 1.8  |
| 2  | ((DTPYC9-F65-2-3-1-1-B-BxDTPYC9-F65-2-2-1-1-B-B)xDTPYC9-F46-1-7-1-1-B-B-B)-B-B-9-1-B-B)-B-B                                 | 5.4    | 6.4              | 2.3  | 1.3  |
| 3  | ([[[K64R/G16SR]-39-1/[K64R/G16SR]-20-2]-5-1-2-B*4/CML390]-B-38-1-B-7#[BETASYN]BC1-1-1-1-#/#Car Syn3-FS11-4-3-B)-5-2-1-B-B-B | 4.7    | 16.2             | 4.7  | 0.99 |
| 4  | ([[[K64R/G16SR]-39-1/[K64R/G16SR]-20-2]-5-1-2-B*4/CML390]-B-38-1-B-7#[BETASYN]BC1-1-1-1-#/#CML305)-5-2-1-B-B-B              | 3.8    | 13.7             | 4.6  | 1.3  |
| 5  | (KUI car syn-FS17-3-2-B-B-B/(KU1409/DE3/KU1409)S2-18-2-B)-B-1(MAS:L4H1)-10-1-B                                              | 1.4    | 4.0              | 1.1  | 14.3 |
| 6  | (CML297/CML486)-2-4-1-B-B-B                                                                                                 | 2.3    | 10.9             | 4.9  | 0.81 |
| 7  | (CML297/CML486)-4-4-1-B-B-B                                                                                                 | 5.0    | 12.1             | 2.6  | 0.88 |
| 8  | (CML300/CML486)-2-5-1-B-B-B                                                                                                 | 3.5    | 7.2              | 4.4  | 0.73 |
| 9  | (CML300/CML486)-7-2-1-B-B-B                                                                                                 | 2.4    | 7.4              | 6.8  | 1.9  |
| 10 | (CML305/CML486)-5-2-3-B-B-B                                                                                                 | 5.6    | 5.6              | 4.7  | 0.87 |
| 11 | (CML305/CML486)-8-1-1-B-B-B                                                                                                 | 2.7    | 9.1              | 6.1  | 2.2  |
| 12 | (Florida A plus Syn-FS2-2-1-B-B/(KU1409/DE3/KU1409)S2-18-2-B)-B-2(MAS:L4H1)-B-B-B                                           | 15.7   | 23.8             | 3.0  | 4.0  |
| 13 | (Florida A plus Syn-FS2-2-1-B-B/(KU1409/DE3/KU1409)S2-18-2-B)-B-5(MAS:L4H1)-1-1-B                                           | 9.7    | 25.1             | 5.3  | 2.1  |
| 14 | (Florida A plus Syn-FS2-2-1-B-B/(KU1409/DE3/KU1409)S2-18-2-B)-B-5(MAS:L4H1)-5-1-B                                           | 10.3   | 19.7             | 3.9  | 3.6  |
| 15 | (KUI car syn-FS11-1-1-B-B-B/(KU1409/DE3/KU1409)S2-18-2-B)-B-1(MAS:L4H1)-1-B-B                                               | 1.4    | 4.7              | 0.58 | 13.0 |
| 16 | (KUI car syn-FS11-1-1-B-B-B/(KU1409/DE3/KU1409)S2-18-2-B)-B-1(MAS:L4H1)-2-B-B                                               | 1.9    | 5.0              | 0.53 | 10.8 |
| 17 | (KUI car syn-FS11-1-1-B-B-B/(KU1409/DE3/KU1409)S2-18-2-B)-B-2(MAS:L4H1)-1-1-B                                               | 0.71   | 1.0              | 0.27 | 12.6 |
| 18 | (KUI car syn-FS11-1-1-B-B-B/(KU1409/DE3/KU1409)S2-18-2-B)-B-2(MAS:L4H1)-2-1-B                                               | 0.89   | 2.4              | 0.45 | 9.5  |
| 19 | (KUI car syn-FS11-1-1-B-B-B/(KU1409/DE3/KU1409)S2-18-2-B)-B-2(MAS:L4H1)-3-1-B                                               | 1.4    | 1.0              | 0.32 | 15.0 |
| 20 | (KUI car syn-FS11-1-1-B-B-B/(KU1409/DE3/KU1409)S2-18-2-B)-B-2(MAS:L4H1)-4-1-B                                               | 1.1    | 0.74             | 0.28 | 10.2 |
| 21 | (KUI car syn-FS11-1-1-B-B-B/(KU1409/DE3/KU1409)S2-18-2-B)-B-2(MAS:L4H1)-5-B-B                                               | 1.0    | 0.58             | 0.33 | 15.8 |
| 22 | (KUI car syn-FS11-1-1-B-B-B/(KU1409/DE3/KU1409)S2-18-2-B)-B-2(MAS:L4H1)-6-1-B                                               | 1.3    | 1.5              | 0.37 | 10.6 |
| 23 | (KUI car syn-FS17-3-2-B-B-B/(KU1409/DE3/KU1409)S2-18-2-B)-B-1(MAS:L4H1)-1-1-B                                               | 1.2    | 6.0              | 0.86 | 11.5 |
| 24 | (KUI car syn-FS17-3-2-B-B-B/(KU1409/DE3/KU1409)S2-18-2-B)-B-1(MAS:L4H1)-8-1-B                                               | 2.1    | 5.1              | 0.77 | 13.5 |
| 25 | (KUI car syn-FS17-3-2-B-B-B/(KU1409/DE3/KU1409)S2-18-2-B)-B-1(MAS:L4H1)-9-1-B                                               | 1.6    | 6.7              | 0.92 | 10.5 |
| 26 | (KUI car syn-FS25-3-2-B-B-B/(KU1409/DE3/KU1409)S2-18-2-B)-B-1(MAS:L4H1)-1-B-B                                               | 2.4    | 4.0              | 0.49 | 8.1  |
| 27 | (KUI car syn-FS25-3-2-B-B-B/(KU1409/DE3/KU1409)S2-18-2-B)-B-2(MAS:L4H1)-1-B-B                                               | 3.0    | 5.0              | 0.49 | 11.4 |
| 28 | (KUI car syn-FS25-3-2-B-B-B/(KU1409/DE3/KU1409)S2-18-2-B)-B-3(MAS:L4H1)-1-B-B                                               | 10.6   | 35.6             | 7.6  | 3.1  |
| 29 | (MAS[MSR/312]-117-2-2-1-B-B-B/[BETASYN]BC1-4-2-1/KUISYN#-B)-B-2-2-B-B-B                                                     | 7.6    | 22.8             | 3.0  | 5.5  |
| 30 | [DTPYC9-F65-2-3-1-1-B-B x DTPYC9-F65-2-2-1-1-B-B]-3-4-2-B-B-B-B-B-B-B                                                       | 10.7   | 15.4             | 6.7  | 3.4  |
| 31 | [DTPYC9-F74-1-1-1-1-B-B x DTPYC9-F65-2-2-1-1-B-B]-B-3-4-B-B-B-B-B-B-B                                                       | 15.1   | 3.2              | 2.0  | 3.9  |
| 32 | Ac8730SR-##-124-1-5-B-1-#/[BETASYN]BC1-16-2-3-1-2-B-B-B-B-B-B                                                               | 1.7    | 4.0              | 0.85 | 1.1  |

|    |                                                                             |     |      |      |     |
|----|-----------------------------------------------------------------------------|-----|------|------|-----|
| 33 | CML297//[CML197/N3//CML206]-X-32-1-4-B*5/[BETASYN]BC1-4-4-4-1-B-B-B-B-B-B-B | 5.0 | 12.9 | 5.8  | 2.1 |
| 34 | CML489/[BETASYN]BC1-5-2-1-B-B-B-B-B-B-B                                     | 8.9 | 23.6 | 2.0  | 3.5 |
| 35 | CML496-B-B-B                                                                | 4.3 | 15.1 | 5.2  | 1.5 |
| 36 | KUI car syn-FS17-3-2-B-B-B-B-B-B-B                                          | 5.0 | 41.6 | 6.9  | 2.3 |
| 37 | KUI car syn-FS25-3-2-B-B-B-B-B-B-B                                          | 3.2 | 39.5 | 4.6  | 2.5 |
| 38 | MAS[206/312]-23-2-1-1-B-B-B/[BETASYN]BC1-4-1-1-1-B-B-B-B-B-B-B              | 1.2 | 5.5  | 0.95 | 2.1 |
| 39 | MAS[206/312]-23-2-1-1-B-B-B/[BETASYN]BC1-6-1-2-1-7-B-B-B-B-B-B              | 1.8 | 4.9  | 1.2  | 2.4 |
| 40 | MAS[206/312]-23-2-1-1-B-B-B/[BETASYN]BC1-9-3-1-1-2-B-B-B-B-B-B              | 1.9 | 4.7  | 1.2  | 2.9 |
| 41 | MAS[MSR/312]-117-2-2-1-B-B-B/[BETASYN]BC1-11-5-2-1-3-B-B-B-B-B-B            | 4.2 | 4.6  | 3.4  | 1.5 |
| 42 | OBATANPA-SRc1F3(balbulk1)-#bal/[BETASYN]BC1-54-1-2-B-B-B-B-B-B-B            | 3.2 | 16.6 | 6.6  | 1.5 |
| 43 | CML297-B                                                                    | 2.5 | 9.5  | 7.8  | 2.2 |
| 44 | CML305-B                                                                    | 2.1 | 8.5  | 5.2  | 1.5 |

<sup>a</sup> Abbreviations: Zea, zeaxanthin;  $\beta$ CX,  $\beta$ -cryptoxanthin;  $\beta$ C,  $\beta$ -carotene.
